# Supplementary material for: Pericardial disease in patients treated with immune checkpoint inhibitors
Source: PubMed Central journal article supplement — J Immunother Cancer. 2021 Jun 18;9(6):e002771. doi: 10.1136/jitc-2021-002771 (PMC8215235; doi:10.1136/jitc-2021-002771), 2021-06-18
Supplement: jitc-2021-002771supp001.pdf [file jitc-2021-002771supp001.pdf]

| <b>Supplemental Table 1: Indications of baseline corticosteroids (within 30 days prior to start date)</b> |                                          |                                                         |                                                                                             |
|-----------------------------------------------------------------------------------------------------------|------------------------------------------|---------------------------------------------------------|---------------------------------------------------------------------------------------------|
|                                                                                                           | <b>Type of corticosteroids</b>           | <b>Dosing of corticosteroids</b>                        | <b>Indications of corticosteroids</b>                                                       |
| Patients who developed pericardial disease                                                                | Dexamethasone                            | 12 mg                                                   | With treatment of olarutumab                                                                |
|                                                                                                           | Dexamethasone                            | 4 mg twice daily                                        | A focal seizure following stereotactic radiosurgery treatment requiring dexamethasone taper |
|                                                                                                           | Methyl-prednisone followed by prednisone | 60mg daily methylprednisone followed by 10mg prednisone | For possible immune checkpoint inhibitor induced pneumonitis                                |
|                                                                                                           | Prednisone                               | 50 mg daily                                             | Premedication for CT scan                                                                   |
|                                                                                                           | Prednisone                               | 40 mg daily                                             | Burst treatment for presumed chronic obstructive pulmonary disease exacerbation             |
|                                                                                                           | Prednisone                               | 5 mg daily                                              | Started for orthostasis                                                                     |
|                                                                                                           | Prednisone                               | 60 mg daily                                             | Burst treatment for presumed chronic obstructive pulmonary disease exacerbation             |
| Patients who did not develop pericardial disease                                                          | Dexamethasone                            | 4 mg twice daily                                        | With whole brain radiotherapy                                                               |
|                                                                                                           | Prednisone                               | 20 mg daily                                             | Concern for grade I pneumonitis related to immune checkpoint inhibitors                     |
|                                                                                                           | Prednisone                               | 10 mg daily                                             | Treatment for presumed chronic obstructive pulmonary disease exacerbation                   |
|                                                                                                           | Dexamethasone                            | 4mg twice daily                                         | Premedication for carboplatin/pemetrexed/pembrolizumab                                      |
|                                                                                                           | Prednisone                               | 50 mg daily                                             | Premedication for CT scan                                                                   |

**Supplemental Table 2: Univariate Cox regression model to evaluate for association of baseline characteristics with pericardial disease**

|                                                                            | Hazard Ratio for pericardial disease (95% confidence interval) | Chi-square | P value |
|----------------------------------------------------------------------------|----------------------------------------------------------------|------------|---------|
| Age >65                                                                    | 0.74 (0.45, 1.22)                                              | 1.38       | 0.24    |
| Overweight                                                                 | 0.63 (0.34, 1.17)                                              | 2.16       | 0.14    |
| Hypertension                                                               | 0.73 (0.44, 1.20)                                              | 1.59       | 0.21    |
| Diabetes mellitus                                                          | 0.61 (0.28, 1.33)                                              | 1.55       | 0.21    |
| Smoking                                                                    | 0.96 (0.46, 2.01)                                              | 0.01       | 0.90    |
| Chronic kidney disease                                                     | 1.51 (0.77, 2.98)                                              | 1.44       | 0.23    |
| Prior pericardial disease                                                  | 5.16 (1.26, 21.13)                                             | 5.20       | 0.022   |
| Myocardial infarction                                                      | 0.30 (0.04, 2.14)                                              | 1.46       | 0.23    |
| Prior cardiovascular events                                                | 0.26 (0.06, 1.05)                                              | 3.58       | 0.06    |
| Angiotensin converting enzyme inhibitor or angiotensin II receptor blocker | 0.81 (0.44, 1.49)                                              | 0.48       | 0.49    |
| Beta-blockers                                                              | 1.29 (0.76, 2.21)                                              | 0.89       | 0.34    |
| Calcium channel blockers                                                   | 0.55 (0.22, 1.36)                                              | 1.68       | 0.19    |
| Diuretics                                                                  | 1.52 (0.90, 2.58)                                              | 2.41       | 0.12    |
| Aspirin                                                                    | 0.90 (0.49, 1.66)                                              | 0.12       | 0.74    |
| Baseline corticosteroid use                                                | 2.56 (1.27, 5.15)                                              | 6.92       | 0.0085  |
| Lung                                                                       | 4.22 (2.55, 6.98)                                              | 31.38      | <0.001  |
| Head and neck                                                              | 0.71 (0.30, 1.64)                                              | 0.66       | 0.42    |
| Breast                                                                     | 0.64 (0.16, 2.60)                                              | 0.40       | 0.53    |
| Gynecologic                                                                | 1.88 (0.75, 4.68)                                              | 1.82       | 0.18    |
| Hepatobiliary                                                              | 0.51 (0.07, 3.66)                                              | 0.45       | 0.50    |

|                            |                   |        |       |
|----------------------------|-------------------|--------|-------|
| Radiation therapy          | 0.84 (0.38, 1.85) | 0.18   | 0.67  |
| 5-fluorouracil             | 0.22 (0.03 1.60)  | 2.24   | 0.13  |
| Anthracyclines             | 0.50 (0.12, 2.05) | 0.91   | 0.34  |
| Tyrosine kinase inhibitors | 1.01 (0.14, 7.32) | 0.0002 | 0.99  |
| Platinum-based therapy     | 2.22 (1.34, 3.67) | 9.59   | 0.002 |

| <b>Supplemental Table 3: Association with pericardial disease</b>                                                                                                                                                                                                                  |                                      |            |         |
|------------------------------------------------------------------------------------------------------------------------------------------------------------------------------------------------------------------------------------------------------------------------------------|--------------------------------------|------------|---------|
|                                                                                                                                                                                                                                                                                    | Hazard Ratio for pericardial disease | Chi-square | P value |
| Treatment with ICI                                                                                                                                                                                                                                                                 | 12.86 (5.40, 30.61)                  | 33.3       | <0.001  |
| <b>Multivariate model</b>                                                                                                                                                                                                                                                          |                                      |            |         |
| Treatment with ICI                                                                                                                                                                                                                                                                 | 7.87 (2.99, 20.71)                   | 17.5       | <0.001  |
| Lung cancer                                                                                                                                                                                                                                                                        | 6.37 (3.18, 12.77)                   | 27.2       | <0.001  |
| Prior pericardial disease                                                                                                                                                                                                                                                          | 2.95 (0.70, 12.39)                   | 2.17       | 0.14    |
| Prior radiation                                                                                                                                                                                                                                                                    | 0.72 (0.28, 1.86)                    | 0.47       | 0.49    |
| History of cardiovascular events                                                                                                                                                                                                                                                   | 0.18 (0.03, 1.31)                    | 2.8        | 0.09    |
| Platinum-based therapy                                                                                                                                                                                                                                                             | 1.10 (0.57, 2.13)                    | 0.09       | 0.77    |
| Baseline corticosteroid use                                                                                                                                                                                                                                                        | 2.01 (0.97, 4.17)                    | 3.49       | 0.07    |
| The risk of pericardial disease in 2842 patients treated with ICI were compared to reference group including 2699 age and cancer type matched patients with metastatic disease who did receive ICI treatment (Design 1). Follow-up time was limited to two years in this analysis. |                                      |            |         |

| <b>Supplemental Table 4: causes of death in patients who developed pericardial disease</b> |                                                                    |                                                                           |
|--------------------------------------------------------------------------------------------|--------------------------------------------------------------------|---------------------------------------------------------------------------|
| <b>Cause of Death</b>                                                                      | Patients who received ICI and developed pericardial disease (n=26) | Patients who did not receive ICI and developed pericardial disease (n=14) |
| Disease progression                                                                        | 17 (65.4%)                                                         | 6 (42.9%)                                                                 |
| Immune related adverse events                                                              | 2 (7.7%)                                                           | 0                                                                         |
| Pericardial disease                                                                        | 3 (11.5%)                                                          | 0                                                                         |
| Other causes                                                                               | 1 (3.8%)                                                           | 3 (21.4%)                                                                 |
| Missing information                                                                        | 3 (11.5%)                                                          | 5 (35.7%)                                                                 |
